# Supplementary material
Source: publisher figshare collection journal article supplement (https://acs.figshare.com/ndownloader/files/28954762)
Supplement: Supplementary file 1 [file 28954762]

# Supporting Information

## **A DNzyme sensor that uses chemiluminescence resonance energy transfer for rapid, portable and ratiometric detection of metal ions**

Jiao Zheng,<sup>†,§</sup> Jing Luen Wai,<sup>†,#</sup> Ryan J. Lake,<sup>†</sup> Siu Yee New,<sup>\*,#</sup> Zhike He,<sup>\*,§</sup> Yi Lu<sup>\*,†,‡</sup>

<sup>†</sup>Department of Chemistry, <sup>‡</sup> Department of Biochemistry, University of Illinois at Urbana–Champaign, Urbana, Illinois 61801, United States; Email: [yi-lu@illinois.edu](mailto:yi-lu@illinois.edu)

<sup>§</sup>Key Laboratory of Analytical Chemistry for Biology and Medicine (Ministry of Education), College of Chemistry and Molecular Sciences, Wuhan University, Wuhan 430072, China; Email: [zhkhe@whu.edu.cn](mailto:zhkhe@whu.edu.cn)

<sup>#</sup> School of Pharmacy, University of Nottingham Malaysia, Jalan Broga, Semenyih, 43500, Selangor, Malaysia; Email: [New@nottingham.edu.my](mailto:New@nottingham.edu.my)

## Table of Contents

|                                                                                       |      |
|---------------------------------------------------------------------------------------|------|
| Normalized spectra of oxidized luminol and fluorescein.....                           | S-3  |
| The chemiluminescence intensity of designed DNAzyme-CRET probe.....                   | S-4  |
| The changes of CRET ratio on DNAzyme-CRET probe at different lengths of T-spacer..... | S-5  |
| The effect of varied reaction temperature on DNAzyme-CRET probe.....                  | S-6  |
| The effect of varying reaction pH on DNAzyme-CRET probe.....                          | S-7  |
| Optimizing catalytic oxidation efficiency of luminol.....                             | S-8  |
| Calibration curve for Pb <sup>2+</sup> detection by fluorometer.....                  | S-9  |
| Photographed image for DNAzyme CRET sensor.....                                       | S-10 |
| Real working process for smartphone measurement.....                                  | S-10 |
| Table for comparison of the reported sensors.....                                     | S11  |

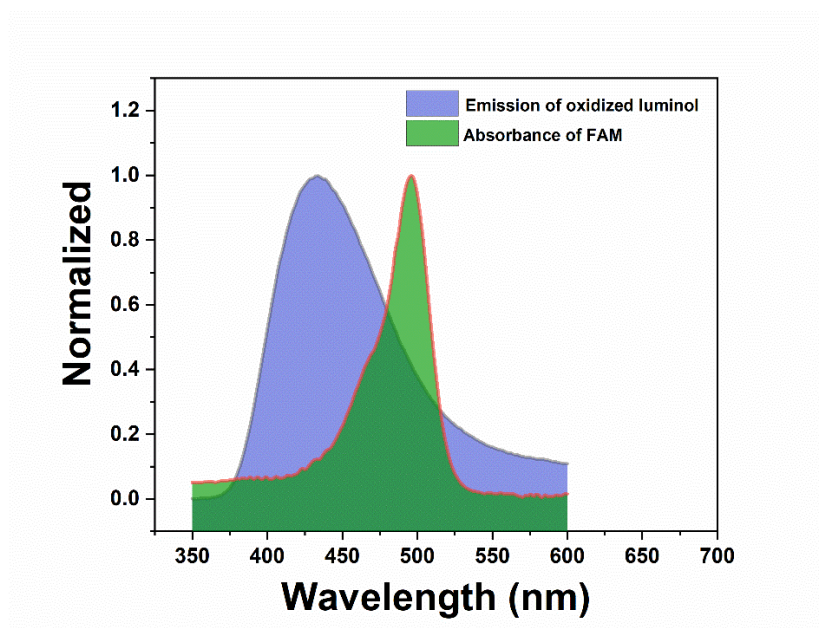

**Figure S1.** Normalized emission (Em.) spectra of oxidized luminol (donor, blue) and normalized absorbance (Abs.) spectra of fluorescein (acceptor, green) with their spectral overlapping area colored dark green.

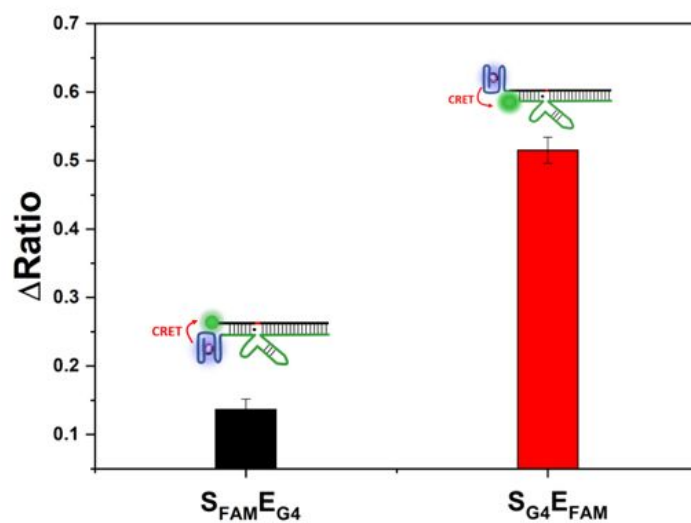

**Figure S2.** The chemiluminescence intensity of designed DNAzyme-CRET probe before addition of  $Pb^{2+}$  ions under varying positions of G4 sequence and fluorescein. Comparing  $S_{FAM}-E_{G4}$  probe and  $S_{G4}-E_{FAM}$  probe, the CRET signal of the latter combination was drastically increased, suggesting the incompatibility of both G4 sequence and catalytic core sequence to be presented on E strand simultaneously.

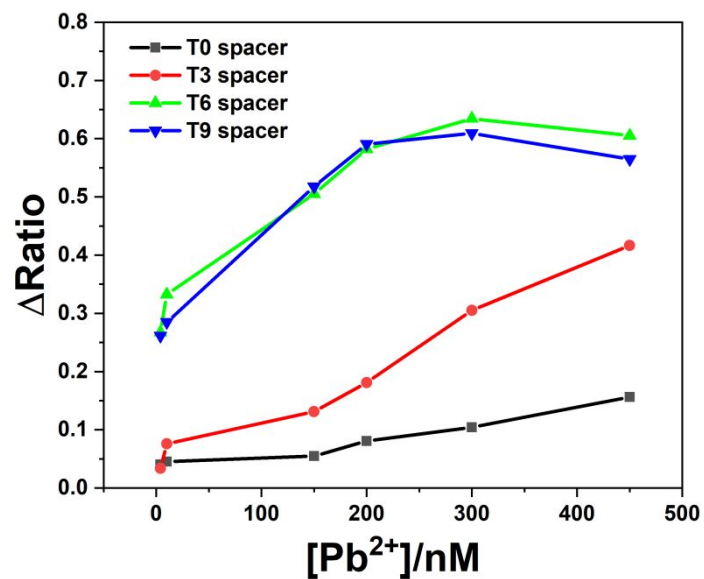

**Figure S3.** The changes of CRET ratio on DNAzyme-CRET probe in respond to increasing  $\text{Pb}^{2+}$  concentrations at different lengths of T-spacer. By increasing the T-spacer from 0 to 9 nucleotides, the CRET signal was drastically increased until a stable  $\Delta\text{Ratio}$  was reached, indicating that the proximity of G4 could interfere with the subsequent sensitivity towards  $\text{Pb}^{2+}$  ions.

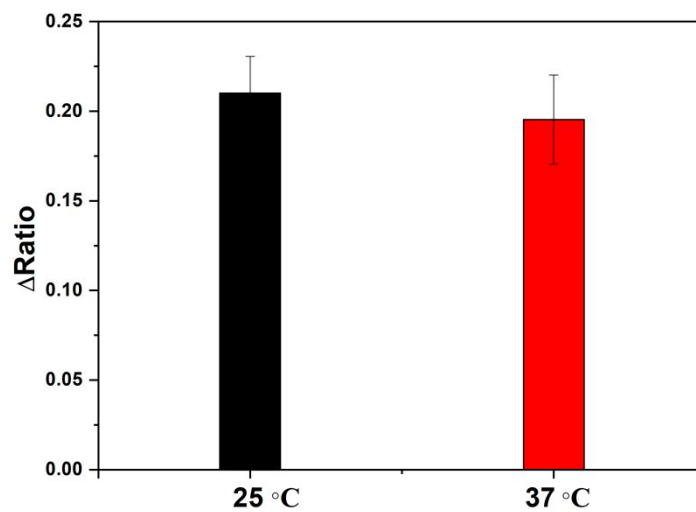

**Figure S4.** The effect of varied reaction temperature on DNAzyme-CRET probe after addition of  $\text{Pb}^{2+}$  ions. The CRET signals of the DNAzyme-CRET probe obtained either at 25 °C or 37 °C were indistinguishable.

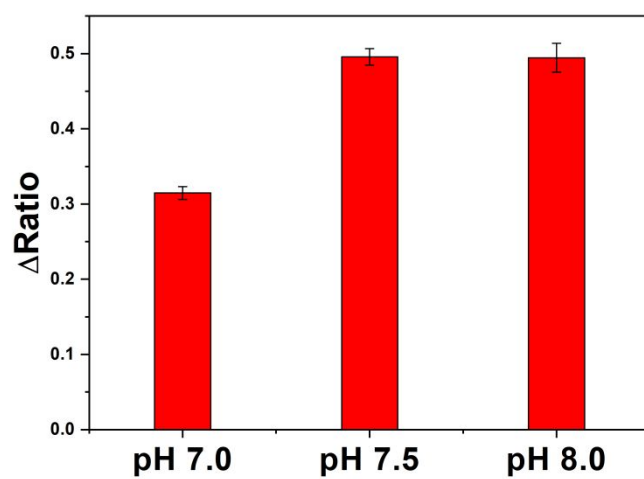

**Figure S5.** The effect of varying reaction pH on DNAzyme-CRET probe after addition of  $\text{Pb}^{2+}$  ions. After an initial sharp increase of  $\Delta\text{Ratio}$ , there is negligible difference between pH 7.5 and pH 8.0, indicating an optimal reaction pH was achieved at pH 7.5.

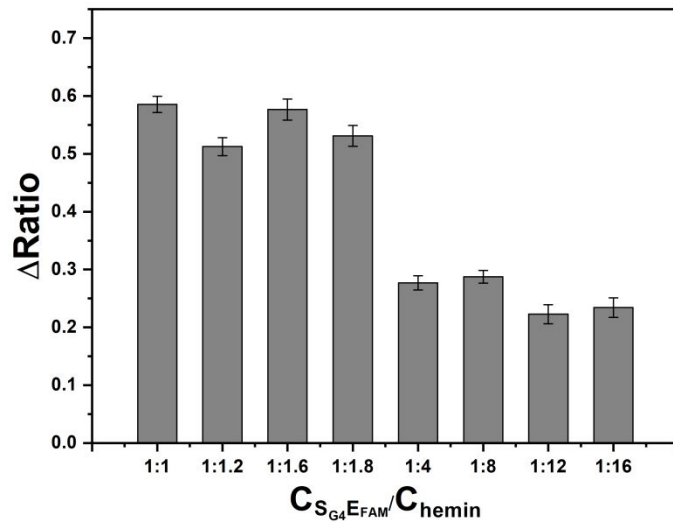

**Figure S6.** Optimizing catalytic oxidation efficiency of luminol by tuning the concentration of hemin. The effect of varying molar ratio between  $S_{G4}-E_{FAM}$  and hemin. With the overall decreasing trend of normalized chemiluminescence intensity, the optimal molar ratio was identified at 1:1.



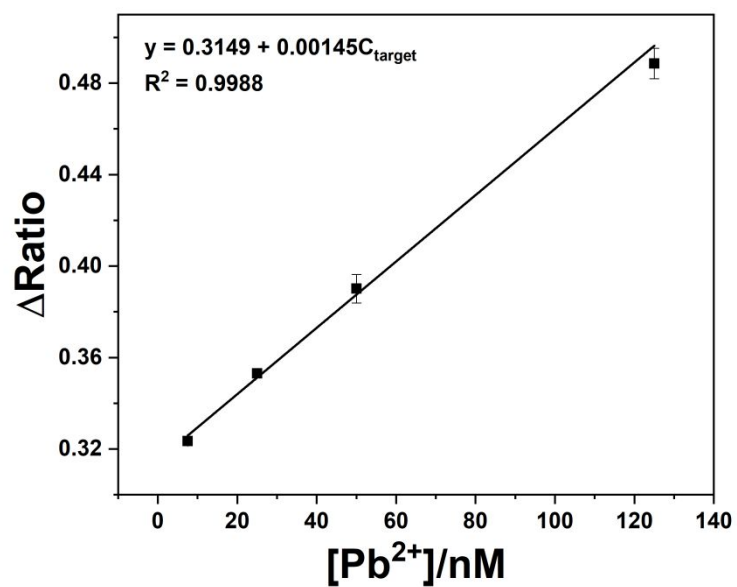

**Figure S7.** Calibration curve achieved by the DNAzyme-CRET sensor for Pb<sup>2+</sup> detection in buffer by fluorometer without an excitation light source. The data collecting procedure was conducted according to the manufacturer's protocol. The linear response range for Pb<sup>2+</sup> is from 7.5 nM to 125 nM.

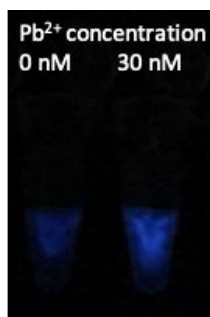

**Figure S8.** Photographed image for DNAzyme CRET sensor in Tris buffer with addition of 0 and 30 nM  $\text{Pb}^{2+}$  ions respectively.

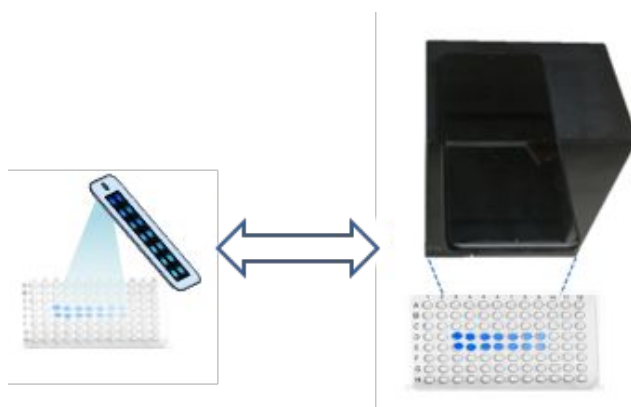

**Figure S9.** Real working process for smartphone measurement.

**Table S1. Comparison of the reported sensors using DNazymes for Pb<sup>2+</sup>**

| NO. | Detection method     | Portability | Dynamic range     | Limit of detection | Ref.      |
|-----|----------------------|-------------|-------------------|--------------------|-----------|
| 1   | Colorimetric         | yes         | 0.4-2 $\mu$ M     | not mentioned      | 1         |
| 2   | FRET                 | no          | 1-50 nM           | 0.2-0.5 nM         | 2         |
| 3   | Colorimetric         | yes         | 120 nM-20 $\mu$ M | 3 nM               | 3         |
| 4   | Fluorescent          | no          | 1 nM-1 $\mu$ M    | 300 pM             | 4         |
| 5   | Fluorescent          | no          | 10 nM-4 $\mu$ M   | 10 nM              | 5         |
| 6   | Photoelectrochemical | no          | 0.1-50 nM         | 0.05 nM            | 6         |
| 7   | CRET                 | yes         | 7.5-125 nM        | 5 nM               | this work |

## References

- (1) Liu, J.; Lu, Y. Accelerated Color Change of Gold Nanoparticles Assembled by DNazymes for Simple and Fast Colorimetric Pb<sup>2+</sup> Detection. *J. Am. Chem. Soc.* **2004**, *126*(39), 12298–12305.
- (2) Wu C., Khaing Oo M., Fan X., Highly Sensitive Multiplexed Heavy Metal Detection Using Quantum-Dot-Labeled DNazymes. *ACS Nano* **2010**, *4*(10), 5897-5904
- (3) Wang Z., Lee J., Lu Y., Label-Free Colorimetric Detection of Lead Ions with a Nanomolar Detection Limit and Tunable Dynamic Range by using Gold Nanoparticles and DNazyme. *Adv. Mat.* **2008**, *20*(17), 3263-3267.
- (4) Zhao X., Kong R., Zhang X., Meng H., Liu W., Tan W., Shen G., Yu R., Graphene–DNazyme Based Biosensor for Amplified Fluorescence “Turn-On” Detection of Pb<sup>2+</sup> with a High Selectivity. *Anal. Chem.* **2011**, *83*(13), 5062-5066.
- (5) Li J., Lu Y., A Highly Sensitive and Selective Catalytic DNA Biosensor for Lead Ions. *J. Am. Chem. Soc.* **2000**, *122*(42), 10466-10467.
- (6) Zang Y., Lei J., Hao Q., Ju H., “Signal-on” photoelectrochemical sensing strategy based on target-dependent aptamer conformational conversion for selective detection

of lead (II) ion. *ACS Appl. Mater. Interfaces*, **2014**, 6, 15991-15997.
